# Supplementary material for: Assessment of Yeasts as Potential Probiotics: A Review of Gastrointestinal Tract Conditions and Investigation Methods
Source: MDPI journal article supplement (doi:10.3390/jof8040365), 2022-04-02
Supplement: s1 [file s1]

# Assessment of Yeasts as Potential Probiotics: A Review of Gastrointestinal Tract Conditions and Investigation Methods

## Supplementary Materials

Nadia S. Alkalbani <sup>1</sup>, Tareq M. Osaili <sup>2,3</sup>, Anas A. Al-Nabulsi <sup>3</sup>, Amin N. Olaimat <sup>4</sup>, Shao-Quan Liu <sup>5</sup>, Nagendra P. Shah <sup>6</sup>, Vasso Apostolopoulos <sup>7,8</sup> and Mutamed M. Ayyash <sup>1,\*</sup>

<sup>1</sup> Department of Food Science, College of Agriculture and Veterinary Medicine, United Arab Emirates University, Al Ain 15551, United Arab Emirates; 950223010@uaeu.ac.ae

<sup>2</sup> Department Clinical Nutrition and Dietetics, University of Sharjah, Sharjah 27272, United Arab Emirates; tosaili@sharjah.ac.ae

<sup>3</sup> Department of Nutrition and Food Technology, Jordan University of Science and Technology, Irbid 22110, Jordan; anas\_nabulsi@just.edu.jo

<sup>4</sup> Department of Clinical Nutrition and Dietetics, Faculty of Applied Medical Sciences, The Hashemite University, P. O. Box 330127, Zarqa 13133, Jordan; aminolaimat@hu.edu.jo

<sup>5</sup> Department of Food Science and Technology, Faculty of Science, National University of Singapore, S14 Level 5, Science Drive 2, Singapore 117542, Singapore; fstlsq@nus.edu.sg

<sup>6</sup> Food and Nutritional Science, School of Biological Sciences, The University of Hong Kong, Pokfulam, Hong Kong 999077, China; npshah@hku.hk

<sup>7</sup> Institute for Health and Sport, Victoria University, Melbourne, VIC 3030, Australia; vasso.apostolopoulos@vu.edu.au

<sup>8</sup> Immunology Program, Australian Institute for Musculoskeletal Science (AIMSS), Melbourne, VIC 3021, Australia

\* Correspondence: mutamed.ayyash@uaeu.ac.ae

**Table S1. The survivability of selected yeast strains undergo in-vitro gastric conditions**

| Genus                    | Species                              | Source                            | Survival Mean | Minimum | Maximum | Count | Reference                          |
|--------------------------|--------------------------------------|-----------------------------------|---------------|---------|---------|-------|------------------------------------|
| <i>Aureobasidium</i>     | <i>Aureobasidium pullulans</i>       | Greek black olives                | 35.55         | 35.55   | 35.55   | 1     | (S Bonatsou et al., 2015)          |
|                          |                                      | table olive fermentation          | 89.38         | 84.5    | 97.6    | 6     | (Stamatoula Bonatsou et al., 2018) |
| <i>Candida</i>           | <i>Candida adriatica</i>             | Olive Oil                         | 23.4          | 16.6    | 30.2    | 2     | (Zullo & Ciafardini, 2019)         |
|                          | <i>Candida boidinii</i>              | fermented black olive             | 29.79         | 4.19    | 55.38   | 2     | (Porru et al., 2018)               |
|                          |                                      | fermented Portuguese table olives | 16.16         | 16.16   | 16.16   | 1     | (Oliveira et al., 2017)            |
|                          |                                      | table olive fermentation          | 90.12         | 85.5    | 95.2    | 6     | (Stamatoula Bonatsou et al., 2018) |
|                          | <i>Candida diddensiae</i>            | fermented black olive             | 65.67         | 64.94   | 66.4    | 2     | (Porru et al., 2018)               |
|                          |                                      | Olive Oil                         | 2.4           | 1.78    | 3.01    | 2     | (Zullo & Ciafardini, 2019)         |
|                          |                                      | table olive fermentation          | 81.73         | 77.3    | 88.2    | 3     | (Stamatoula Bonatsou et al., 2018) |
|                          | <i>Candida molendinolei</i>          | table olive fermentation          | 73.06         | 68.6    | 80.7    | 7     | (Stamatoula Bonatsou et al., 2018) |
|                          | <i>Candida naeodendra</i>            | table olive fermentation          | 86.7          | 81.4    | 92      | 2     | (Stamatoula Bonatsou et al., 2018) |
|                          | <i>Candida norvegica</i>             | fermented Portuguese table olives | 49.75         | 49.75   | 49.75   | 1     | (Oliveira et al., 2017)            |
|                          | <i>Candida silvae</i>                | Greek black olives                | 33.25         | 33.25   | 33.25   | 1     | (S Bonatsou et al., 2015)          |
|                          | <i>Candida tropicalis</i>            | fermented Portuguese table olives | 133.7         | 72.65   | 194.76  | 2     | (Oliveira et al., 2017)            |
| <i>Citeromyces</i>       | <i>Citeromyces matrinensis</i>       | table olive fermentation          | 86.9          | 86.9    | 86.9    | 1     | (Stamatoula Bonatsou et al., 2018) |
| <i>Cystofilobasidium</i> | <i>Cystofilobasidium bisporeidii</i> | table olive fermentation          | 94.8          | 94.8    | 94.8    | 1     | (Stamatoula Bonatsou et al., 2018) |
| <i>Debaryomyces</i>      | <i>Debaryomyces hansenii</i>         | fermented Portuguese table olives | 40.71         | 40.71   | 40.71   | 1     | (Oliveira et al., 2017)            |
|                          |                                      | Greek black olives                | 90.37         | 90.37   | 90.37   | 1     | (S Bonatsou et al., 2015)          |
| <i>Metschnikowia</i>     | <i>Metschnikowia pulcherrima</i>     | Greek black olives                | 75.01         | 75.01   | 75.01   | 1     | (S Bonatsou et al., 2015)          |
|                          |                                      | table olive fermentation          | 96.43         | 95.7    | 97.5    | 3     | (Stamatoula Bonatsou et al., 2018) |
| <i>Nakazawaea</i>        | <i>Nakazawaea molendini-olei</i>     | fermented black olive             | 15.43         | 15.43   | 15.43   | 1     | (Porru et al., 2018)               |
|                          |                                      | Olive Oil                         | 21.11         | 3.8     | 38.41   | 2     | (Zullo & Ciafardini, 2019)         |
|                          | <i>Nakazawaea wickerhamii</i>        | Olive Oil                         | 75.86         | 75.86   | 75.86   | 1     | (Zullo & Ciafardini, 2019)         |
| <i>Pichia</i>            | <i>Pichia guilliermondii</i>         | fermented Portuguese table olives | 179.43        | 179.43  | 179.43  | 1     | (Oliveira et al., 2017)            |
|                          |                                      | Greek black olives                | 492.05        | 492.05  | 492.05  | 1     | (S Bonatsou et al., 2015)          |
|                          |                                      | table olive fermentation          | 93.85         | 91.3    | 96.4    | 2     | (Stamatoula Bonatsou et al., 2018) |
|                          | <i>Pichia kluyveri</i>               | Greek black olives                | 87.77         | 87.77   | 87.77   | 1     | (S Bonatsou et al., 2015)          |
|                          |                                      | table olive fermentation          | 83.5          | 78.7    | 88.3    | 2     | (Stamatoula Bonatsou et al., 2018) |
|                          | <i>Pichia manshurica</i>             | fermented Portuguese table olives | 29.63         | 29.63   | 29.63   | 1     | (Oliveira et al., 2017)            |
|                          |                                      | Greek black olives                | 76.96         | 76.96   | 76.96   | 1     | (S Bonatsou et al., 2015)          |
|                          |                                      | table olive fermentation          | 91.87         | 90      | 92.9    | 3     | (Stamatoula Bonatsou et al., 2018) |
|                          | <i>Pichia membranifaciens</i>        | Greek black olives                | 60.44         | 60.44   | 60.44   | 1     | (S Bonatsou et al., 2015)          |

|                          |                                 |                                    |       |       |       |   |                                    |
|--------------------------|---------------------------------|------------------------------------|-------|-------|-------|---|------------------------------------|
| <i>Rhodotorula</i>       | <i>Rhodotorula diobovatum</i>   | Greek black olives                 | 47.54 | 47.54 | 47.54 | 1 | (S Bonatsou et al., 2015)          |
|                          |                                 | table olive fermentation           | 86.37 | 75.7  | 91.7  | 3 | (Stamatoula Bonatsou et al., 2018) |
|                          | <i>Rhodotorula mucilaginosa</i> | Greek black olives                 | 31.33 | 31.33 | 31.33 | 1 | (S Bonatsou et al., 2015)          |
|                          |                                 | table olive fermentation           | 82.7  | 82.7  | 82.7  | 1 | (Stamatoula Bonatsou et al., 2018) |
| <i>Saccharomyces</i>     | <i>Saccharomyces boulardii</i>  | fermented black olive              | 95.88 | 95.88 | 95.88 | 1 | (Porru et al., 2018)               |
|                          |                                 | fermented Portugalian table olives | 44.43 | 44.43 | 44.43 | 1 | (Oliveira et al., 2017)            |
|                          |                                 | Olive Oil                          | 66.06 | 66.06 | 66.06 | 1 | (Zullo & Ciafardini, 2019)         |
|                          | <i>Saccharomyces cerevisiae</i> | fermented black olive              | 79.68 | 79.68 | 79.68 | 1 | (Porru et al., 2018)               |
|                          |                                 | fermented Portugalian table olives | 21.16 | 3.16  | 39.15 | 2 | (Oliveira et al., 2017)            |
|                          |                                 | Greek black olives                 | 51.02 | 51.02 | 51.02 | 1 | (S Bonatsou et al., 2015)          |
|                          |                                 | table olive fermentation           | 93.03 | 89.9  | 98.8  | 6 | (Stamatoula Bonatsou et al., 2018) |
| <i>Wickerhamomyces</i>   | <i>Wickerhamomyces anomalus</i> | fermented black olive              | 49.15 | 49.15 | 49.15 | 1 | (Porru et al., 2018)               |
|                          |                                 | Greek black olives                 | 40.48 | 40.48 | 40.48 | 1 | (S Bonatsou et al., 2015)          |
|                          |                                 | Olive Oil                          | 33.95 | 17.78 | 50.12 | 2 | (Zullo & Ciafardini, 2019)         |
| <i>Yamadazyma</i>        | <i>Yamadazyma terventina</i>    | Olive Oil                          | 17.91 | 10.12 | 25.7  | 2 | (Zullo & Ciafardini, 2019)         |
| <i>Zygoascus</i>         | <i>Zygoascus hellenicus</i>     | table olive fermentation           | 93.87 | 91.2  | 97.7  | 3 | (Stamatoula Bonatsou et al., 2018) |
| <i>Zygosaccharomyces</i> | <i>Zygosaccharomyces mrakii</i> | fermented black olive              | 19.54 | 19.54 | 19.54 | 1 | (Porru et al., 2018)               |

---

pH.2, pepsin 0.0133g/L, 2.5 h, 37°C, buffer: NaCl (2.05 g/L), KH<sub>2</sub>PO<sub>4</sub> (0.60 g/ L), CaCl<sub>2</sub> (0.11 g/L) and KCl (0.37 g/L)

**Table S2. The survivability of selected yeast strains undergo in-vitro intestinal conditions**

| Genus                    | Species                             | Sources                           | Survival | Minimum | Maximum | Count | Reference                          |
|--------------------------|-------------------------------------|-----------------------------------|----------|---------|---------|-------|------------------------------------|
| <i>Aureobasidium</i>     | <i>Aureobasidium pullulans</i>      | Greek black olives                | 0        | 0       | 0       | 1     | (S Bonatsou et al., 2015)          |
|                          |                                     | table olive fermentation          | 40.85    | 0       | 91.4    | 6     | (Stamatoula Bonatsou et al., 2018) |
| <i>Candida</i>           | <i>Candida adriatica</i>            | Olive Oil                         | 7.26     | 6.92    | 7.59    | 2     | (Zullo & Ciafardini, 2019)         |
|                          | <i>Candida boidinii</i>             | fermented black olive             | 12.82    | 3.53    | 22.1    | 2     | (Porru et al., 2018)               |
|                          |                                     | fermented Portuguese table olives | 18.17    | 18.17   | 18.17   | 1     | (Oliveira et al., 2017)            |
|                          |                                     | table olive fermentation          | 60.47    | 0       | 81.6    | 6     | (Stamatoula Bonatsou et al., 2018) |
|                          | <i>Candida diddensiae</i>           | fermented black olive             | 31.63    | 24.76   | 38.49   | 2     | (Porru et al., 2018)               |
|                          |                                     | Olive Oil                         | 0.45     | 0.28    | 0.62    | 2     | (Zullo & Ciafardini, 2019)         |
|                          |                                     | table olive fermentation          | 66.67    | 65.4    | 69      | 3     | (Stamatoula Bonatsou et al., 2018) |
|                          | <i>Candida molendinolei</i>         | table olive fermentation          | 62.63    | 51      | 89.8    | 7     | (Stamatoula Bonatsou et al., 2018) |
|                          | <i>Candida naeodendra</i>           | table olive fermentation          | 35.85    | 0       | 71.7    | 2     | (Stamatoula Bonatsou et al., 2018) |
|                          | <i>Candida norvegica</i>            | fermented Portuguese table olives | 125.75   | 125.75  | 125.75  | 1     | (Oliveira et al., 2017)            |
|                          | <i>Candida silvae</i>               | Greek black olives                | 60.22    | 60.22   | 60.22   | 1     | (S Bonatsou et al., 2015)          |
|                          | <i>Candida tropicalis</i>           | fermented Portuguese table olives | 58.76    | 56.11   | 61.41   | 2     | (Oliveira et al., 2017)            |
| <i>Citeromyces</i>       | <i>Citeromyces matrinensis</i>      | table olive fermentation          | 55.3     | 55.3    | 55.3    | 1     | (Stamatoula Bonatsou et al., 2018) |
| <i>Cystofilobasidium</i> | <i>Cystofilobasidium bisporidii</i> | table olive fermentation          | 87.5     | 87.5    | 87.5    | 1     | (Stamatoula Bonatsou et al., 2018) |
| <i>Debaryomyces</i>      | <i>Debaryomyces hansenii</i>        | fermented Portuguese table olives | 97.74    | 97.74   | 97.74   | 1     | (Oliveira et al., 2017)            |
|                          |                                     | Greek black olives                | 0.08     | 0.08    | 0.08    | 1     | (S Bonatsou et al., 2015)          |
| <i>Metschnikowia</i>     | <i>Metschnikowia pulcherrima</i>    | Greek black olives                | 12.1     | 12.1    | 12.1    | 1     | (S Bonatsou et al., 2015)          |
|                          |                                     | table olive fermentation          | 89.4     | 87.7    | 91.2    | 3     | (Stamatoula Bonatsou et al., 2018) |
| <i>Nakazawaea</i>        | <i>Nakazawaea molendini-olei</i>    | fermented black olive             | 0.02     | 0.02    | 0.02    | 1     | (Porru et al., 2018)               |
|                          |                                     | Olive Oil                         | 0.28     | 0.25    | 0.31    | 2     | (Zullo & Ciafardini, 2019)         |
|                          | <i>Nakazawaea wickerhamii</i>       | Olive Oil                         | 2.34     | 2.34    | 2.34    | 1     | (Zullo & Ciafardini, 2019)         |
| <i>Pichia</i>            | <i>Pichia guilliermondii</i>        | fermented Portuguese table olives | 68.91    | 68.91   | 68.91   | 1     | (Oliveira et al., 2017)            |
|                          |                                     | Greek black olives                | 63.8     | 63.8    | 63.8    | 1     | (S Bonatsou et al., 2015)          |
|                          |                                     | table olive fermentation          | 81.85    | 81.2    | 82.5    | 2     | (Stamatoula Bonatsou et al., 2018) |
|                          | <i>Pichia kluyveri</i>              | Greek black olives                | 40.84    | 40.84   | 40.84   | 1     | (S Bonatsou et al., 2015)          |
|                          |                                     | table olive fermentation          | 72.25    | 64.4    | 80.1    | 2     | (Stamatoula Bonatsou et al., 2018) |
|                          | <i>Pichia manshurica</i>            | fermented Portuguese table olives | 11.05    | 11.05   | 11.05   | 1     | (Oliveira et al., 2017)            |
|                          |                                     | Greek black olives                | 57.28    | 57.28   | 57.28   | 1     | (S Bonatsou et al., 2015)          |

|                          |                                 |                                    |       |       |        |   |                                    |
|--------------------------|---------------------------------|------------------------------------|-------|-------|--------|---|------------------------------------|
|                          |                                 | table olive fermentation           | 79.87 | 78.4  | 82.5   | 3 | (Stamatoula Bonatsou et al., 2018) |
|                          | <i>Pichia membranifaciens</i>   | Greek black olives                 | 11.29 | 11.29 | 11.29  | 1 | (S Bonatsou et al., 2015)          |
| <i>Rhodotorula</i>       | <i>Rhodotorula diobovatum</i>   | Greek black olives                 | 3.83  | 3.83  | 3.83   | 1 | (S Bonatsou et al., 2015)          |
|                          | <i>Rhodotorula glutinis</i>     | table olive fermentation           | 70.6  | 62.4  | 76.8   | 3 | (Stamatoula Bonatsou et al., 2018) |
|                          | <i>Rhodotorula mucilaginosa</i> | Greek black olives                 | 53.38 | 53.38 | 53.38  | 1 | (S Bonatsou et al., 2015)          |
|                          |                                 | table olive fermentation           | 71.1  | 71.1  | 71.1   | 1 | (Stamatoula Bonatsou et al., 2018) |
| <i>Saccharomyces</i>     | <i>Saccharomyces boulardii</i>  | fermented black olive              | 10.99 | 10.99 | 10.99  | 1 | (Porru et al., 2018)               |
|                          |                                 | fermented Portugalian table olives | 99.79 | 99.79 | 99.79  | 1 | (Oliveira et al., 2017)            |
|                          |                                 | Olive Oil                          | 6.92  | 6.92  | 6.92   | 1 | (Zullo & Ciafardini, 2019)         |
|                          | <i>Saccharomyces cerevisiae</i> | fermented black olive              | 46.6  | 46.6  | 46.6   | 1 | (Porru et al., 2018)               |
|                          |                                 | fermented Portugalian table olives | 94.29 | 12.61 | 175.98 | 2 | (Oliveira et al., 2017)            |
|                          |                                 | Greek black olives                 | 64.28 | 64.28 | 64.28  | 1 | (S Bonatsou et al., 2015)          |
|                          |                                 | table olive fermentation           | 54.42 | 6.7   | 90.9   | 6 | (Stamatoula Bonatsou et al., 2018) |
| <i>Wickerhamomyces</i>   | <i>Wickerhamomyces anomalus</i> | fermented black olive              | 5.28  | 5.28  | 5.28   | 1 | (Porru et al., 2018)               |
|                          |                                 | Greek black olives                 | 13.39 | 13.39 | 13.39  | 1 | (S Bonatsou et al., 2015)          |
|                          |                                 | Olive Oil                          | 0.21  | 0.08  | 0.35   | 2 | (Zullo & Ciafardini, 2019)         |
| <i>Yamadazyma</i>        | <i>Yamadazyma terventina</i>    | Olive Oil                          | 1.93  | 1.41  | 2.45   | 2 | (Zullo & Ciafardini, 2019)         |
| <i>Zygoascus</i>         | <i>Zygoascus hellenicus</i>     | table olive fermentation           | 72.4  | 65.1  | 86.5   | 3 | (Stamatoula Bonatsou et al., 2018) |
| <i>Zygosaccharomyces</i> | <i>Zygosaccharomyces mrakii</i> | fermented black olive              | 0.1   | 0.1   | 0.1    | 1 | (Porru et al., 2018)               |

---

pH 8.0, pancreatin 0.1 g/L, bile salts 3.0g/L, 3.5h, 37°C) Buffer:50.81 g/L of sodium phosphate dibasic heptahydrate and 8.5 g/L of NaCl

**Table S3. Evaluated of NIC (non-inhibitory concentration) and MIC (minimum inhibitory concentration) values (g/L) measured under salt (NaCl) for the yeast strains**

| Genus                | Species                        | Source                                | NaCl%     | pH           | Time          | Temp.        | NIC (g/L)<br>mean | Minimu<br>m | Maximu<br>m | MIC<br>(g/L)mean | Minimu<br>m | Maximu<br>m | Cou<br>nt | Referenc<br>e                       |
|----------------------|--------------------------------|---------------------------------------|-----------|--------------|---------------|--------------|-------------------|-------------|-------------|------------------|-------------|-------------|-----------|-------------------------------------|
| <i>Aureobasidium</i> | <i>Aureobasidium pullulans</i> | cv. Kalamata table olive fermentation | 0-250 g/L | 3.5          | 12h for 7days | Not mentined | 24.6              | 0           | 42.4        | 115.5            | 0           | 207.2       | 6         | (Stamato ula Bonatsou et al., 2018) |
|                      |                                |                                       |           | 5            | 12h for 7days | Not mentined | 49.98             | 41.8        | 71.2        | 162.97           | 110.6       | 191.5       | 6         | (Stamato ula Bonatsou et al., 2018) |
|                      |                                |                                       |           | 6.5          | 12h for 7days | Not mentined | 49.58             | 17.4        | 69.4        | 131.5            | 94.7        | 168.6       | 6         | (Stamato ula Bonatsou et al., 2018) |
|                      |                                | Greek black olives                    | 0-250 g/L | Not mentined | 2h            | Not mentined | 44.47             | 44.47       | 44.47       | 127.09           | 127.09      | 127.09      | 1         | (S Bonatsou et al., 2015)           |
| <i>Candida</i>       | <i>Candida boidinii</i>        | cv. Kalamata table olive fermentation | 0-250 g/L | 3.5          | 12h for 7days | Not mentined | 52.85             | 26.8        | 74.9        | 103.8            | 89.8        | 117.3       | 6         | (Stamato ula Bonatsou et al., 2018) |
|                      |                                |                                       |           | 5            | 12h for 7days | Not mentined | 73.07             | 54.7        | 82.3        | 120.62           | 103.9       | 168.5       | 6         | (Stamato ula Bonatsou et al., 2018) |
|                      |                                |                                       |           | 6.5          | 12h for 7days | Not mentined | 70.22             | 58.8        | 82.1        | 113              | 88.6        | 130.2       | 6         | (Stamato ula Bonatsou et al., 2018) |
|                      | <i>Candida diddensiae</i>      | fermented black olive                 | 0-180 g/L | 4.5          | 7days         | 28           | 68.48             | 68.48       | 68.48       | 110.11           | 110.11      | 110.11      | 1         | (Porru et al., 2018)                |
|                      |                                | cv. Kalamata table olive fermentation | 0-250 g/L | 3.5          | 12h for 7days | Not mentined | 48.77             | 0           | 92.4        | 81.37            | 0           | 155.2       | 3         | (Stamato ula Bonatsou et al., 2018) |
|                      |                                |                                       |           | 5            | 12h for 7days | Not mentined | 24.97             | 0           | 74.9        | 32.7             | 0           | 98.1        | 3         | (Stamato ula Bonatsou et al., 2018) |
|                      |                                |                                       |           | 6.5          | 12h for 7days | Not mentined | 19                | 0           | 57          | 29.53            | 0           | 88.6        | 3         | (Stamato ula Bonatsou               |
|                      |                                |                                       |           |              |               |              |                   |             |             |                  |             |             |           |                                     |

|                    |                                |                                       |           |              |               |              |       |       |       |        |        |        |   |                                                                                                                                                                                                                                                                                                                                                                                                                                                           |
|--------------------|--------------------------------|---------------------------------------|-----------|--------------|---------------|--------------|-------|-------|-------|--------|--------|--------|---|-----------------------------------------------------------------------------------------------------------------------------------------------------------------------------------------------------------------------------------------------------------------------------------------------------------------------------------------------------------------------------------------------------------------------------------------------------------|
| <i>Citeromyces</i> | <i>Candida molendinolei</i>    | fermented black olive                 | 0-180 g/L | 4.5          | 7days         | 28           | 79.13 | 64.58 | 93.67 | 119.54 | 98.95  | 140.12 | 2 | et al., 2018)<br>(Porru et al., 2018)<br>(Stamato ula Bonatsou et al., 2018)<br>(S Bonatsou et al., 2015)<br>(Porru et al., 2018)<br>(Stamato ula Bonatsou et al., 2018)<br>(Stamato ula Bonatsou et al., 2018) |
|                    |                                | cv. Kalamata table olive fermentation | 0-250 g/L | 3.5          | 12h for 7days | Not mentined | 47.11 | 38.8  | 52.7  | 127.57 | 123.4  | 140.9  | 7 |                                                                                                                                                                                                                                                                                                                                                                                                                                                           |
|                    |                                |                                       |           | 5            | 12h for 7days | Not mentined | 76.94 | 61.1  | 92.6  | 134.14 | 125.5  | 163.8  | 7 |                                                                                                                                                                                                                                                                                                                                                                                                                                                           |
|                    |                                |                                       |           | 6.5          | 12h for 7days | Not mentined | 59.31 | 38.3  | 98.1  | 128    | 113.3  | 154.7  | 7 |                                                                                                                                                                                                                                                                                                                                                                                                                                                           |
|                    | <i>Candida naeodendra</i>      | cv. Kalamata table olive fermentation | 0-250 g/L | 3.5          | 12h for 7days | Not mentined | 49.7  | 24.3  | 75.1  | 512.35 | 117.7  | 907    | 2 |                                                                                                                                                                                                                                                                                                                                                                                                                                                           |
|                    |                                |                                       |           | 5            | 12h for 7days | Not mentined | 60.65 | 41.3  | 80    | 158.8  | 112.6  | 205    | 2 |                                                                                                                                                                                                                                                                                                                                                                                                                                                           |
|                    |                                |                                       |           | 6.5          | 12h for 7days | Not mentined | 81    | 76.6  | 85.4  | 111.85 | 101.3  | 122.4  | 2 |                                                                                                                                                                                                                                                                                                                                                                                                                                                           |
|                    | <i>Candida silvae</i>          | Greek black olives                    | 0-250 g/L | Not mentined | 2h            | Not mentined | 45.82 | 45.82 | 45.82 | 134.66 | 134.66 | 134.66 | 1 |                                                                                                                                                                                                                                                                                                                                                                                                                                                           |
|                    | <i>Saccharomyces boidinii</i>  | fermented black olive                 | 0-180 g/L | 4.5          | 7days         | 28           | 80.94 | 80.94 | 80.94 | 115.43 | 115.43 | 115.43 | 1 |                                                                                                                                                                                                                                                                                                                                                                                                                                                           |
|                    | <i>Citeromyces matrinensis</i> | cv. Kalamata table olive fermentation | 0-250 g/L | 3.5          | 12h for 7days | Not mentined | 43.4  | 43.4  | 43.4  | 129.8  | 129.8  | 129.8  | 1 |                                                                                                                                                                                                                                                                                                                                                                                                                                                           |
|                    |                                |                                       |           | 5            | 12h for 7days | Not mentined | 0     | 0     | 0     | 0      | 0      | 0      | 1 |                                                                                                                                                                                                                                                                                                                                                                                                                                                           |
|                    |                                |                                       |           | 6.5          | 12h for 7days | Not mentined | 0     | 0     | 0     | 0      | 0      | 0      | 1 |                                                                                                                                                                                                                                                                                                                                                                                                                                                           |

|                          |                                      |                                       |           |              |               |              |       |       |       |        |        |        |   |                                                                  |
|--------------------------|--------------------------------------|---------------------------------------|-----------|--------------|---------------|--------------|-------|-------|-------|--------|--------|--------|---|------------------------------------------------------------------|
| <i>Cystofilobasidium</i> | <i>Cystofilobasidium bisporeidii</i> | cv. Kalamata table olive fermentation | 0-250 g/L | 3.5          | 12h for 7days | Not mentined | 17    | 17    | 17    | 88.8   | 88.8   | 88.8   | 1 | et al., 2018)<br>(Stamato<br>ula<br>Bonatsou<br>et al.,<br>2018) |
|                          |                                      |                                       |           | 5            | 12h for 7days | Not mentined | 7.1   | 7.1   | 7.1   | 165.9  | 165.9  | 165.9  | 1 | (Stamato<br>ula<br>Bonatsou<br>et al.,<br>2018)                  |
|                          |                                      |                                       |           | 6.5          | 12h for 7days | Not mentined | 4.8   | 4.8   | 4.8   | 205.3  | 205.3  | 205.3  | 1 | (Stamato<br>ula<br>Bonatsou<br>et al.,<br>2018)                  |
| <i>Debaryomyces</i>      | <i>Debaryomyces hansenii</i>         | Greek black olives                    | 0-250 g/L | Not mentined | 2h            | Not mentined | 50.22 | 50.22 | 50.22 | 153.59 | 153.59 | 153.59 | 1 | (S<br>Bonatsou<br>et al.,<br>2015)                               |
| <i>Metschnikowia</i>     | <i>Metschnikowia pulcherrima</i>     | cv. Kalamata table olive fermentation | 0-250 g/L | 3.5          | 12h for 7days | Not mentined | 22.73 | 0     | 43.7  | 66.47  | 0      | 130.3  | 3 | (Stamato<br>ula<br>Bonatsou<br>et al.,<br>2018)                  |
|                          |                                      |                                       |           | 5            | 12h for 7days | Not mentined | 40.2  | 26.4  | 58.1  | 142.3  | 98.4   | 195.7  | 3 | (Stamato<br>ula<br>Bonatsou<br>et al.,<br>2018)                  |
|                          |                                      |                                       |           | 6.5          | 12h for 7days | Not mentined | 20.7  | 0     | 34.2  | 76.43  | 0      | 133.4  | 3 | (Stamato<br>ula<br>Bonatsou<br>et al.,<br>2018)                  |
|                          |                                      | Greek black olives                    | 0-250 g/L | Not mentined | 2h            | Not mentined | 61.08 | 61.08 | 61.08 | 176.65 | 176.65 | 176.65 | 1 | (S<br>Bonatsou<br>et al.,<br>2015)                               |
| <i>Nakazawaea</i>        | <i>Nakazawaea molendini-olei</i>     | fermented black olive                 | 0-180 g/L | 4.5          | 7days         | 28           | 67.2  | 67.2  | 67.2  | 118.92 | 118.92 | 118.92 | 1 | (Porru et al., 2018)                                             |
| <i>Pichia</i>            | <i>Pichia guilliermondii</i>         | cv. Kalamata table olive fermentation | 0-250 g/L | 3.5          | 12h for 7days | Not mentined | 24.2  | 0     | 48.4  | 82.85  | 0      | 165.7  | 2 | (Stamato<br>ula<br>Bonatsou<br>et al.,<br>2018)                  |
|                          |                                      |                                       |           | 5            | 12h for 7days | Not mentined | 81.55 | 75.8  | 87.3  | 207.5  | 204.8  | 210.2  | 2 | (Stamato<br>ula<br>Bonatsou<br>et al.,<br>2018)                  |
|                          |                                      |                                       |           | 6.5          | 12h for 7days | Not mentined | 62.45 | 61.7  | 63.2  | 226.85 | 174.8  | 278.9  | 2 | (Stamato<br>ula                                                  |

|                    |                               |                                       |           |              |               |              |        |        |        |        |        |        |   |                                     |
|--------------------|-------------------------------|---------------------------------------|-----------|--------------|---------------|--------------|--------|--------|--------|--------|--------|--------|---|-------------------------------------|
|                    |                               | Greek black olives                    | 0-250 g/L | Not mentined | 2h            | Not mentined | 109.93 | 109.93 | 109.93 | 261.6  | 261.6  | 261.6  | 1 | Bonatsou et al., 2018)              |
|                    | <i>Pichia kluyveri</i>        | cv. Kalamata table olive fermentation | 0-250 g/L | 3.5          | 12h for 7days | Not mentined | 86.5   | 70.9   | 102.1  | 156.05 | 149.4  | 162.7  | 2 | (S Bonatsou et al., 2015)           |
|                    |                               |                                       |           | 5            | 12h for 7days | Not mentined | 0      | 0      | 0      | 0      | 0      | 0      | 2 | (Stamato ula Bonatsou et al., 2018) |
|                    |                               |                                       |           | 6.5          | 12h for 7days | Not mentined | 0      | 0      | 0      | 0      | 0      | 0      | 2 | (Stamato ula Bonatsou et al., 2018) |
|                    |                               | Greek black olives                    | 0-250 g/L | Not mentined | 2h            | Not mentined | 84.69  | 84.69  | 84.69  | 209.66 | 209.66 | 209.66 | 1 | (S Bonatsou et al., 2015)           |
|                    | <i>Pichia manshurica</i>      | cv. Kalamata table olive fermentation | 0-250 g/L | 3.5          | 12h for 7days | Not mentined | 48.5   | 39.9   | 62     | 159.57 | 149.9  | 178.3  | 3 | (Stamato ula Bonatsou et al., 2018) |
|                    |                               |                                       |           | 5            | 12h for 7days | Not mentined | 60.67  | 50.2   | 70.5   | 134.37 | 128.4  | 144.5  | 3 | (Stamato ula Bonatsou et al., 2018) |
|                    |                               |                                       |           | 6.5          | 12h for 7days | Not mentined | 70     | 64     | 80.6   | 125.93 | 115.2  | 143.3  | 3 | (Stamato ula Bonatsou et al., 2018) |
|                    |                               | Greek black olives                    | 0-250 g/L | Not mentined | 2h            | Not mentined | 71.16  | 71.16  | 71.16  | 152.13 | 152.13 | 152.13 | 1 | (S Bonatsou et al., 2015)           |
|                    | <i>Pichia membranifaciens</i> | Greek black olives                    | 0-250 g/L | Not mentined | 2h            | Not mentined | 20.15  | 20.15  | 20.15  | 154.41 | 154.41 | 154.41 | 1 | (S Bonatsou et al., 2015)           |
| <i>Rhodotorula</i> | <i>Rhodotorula diobovatum</i> | Greek black olives                    | 0-250 g/L | Not mentined | 2h            | Not mentined | 49.97  | 49.97  | 49.97  | 123.7  | 123.7  | 123.7  | 1 | (S Bonatsou et al., 2015)           |

|                      |                                                                   |                                       |           |              |               |              |       |       |       |        |        |        |   |                                     |
|----------------------|-------------------------------------------------------------------|---------------------------------------|-----------|--------------|---------------|--------------|-------|-------|-------|--------|--------|--------|---|-------------------------------------|
| <i>Saccharomyces</i> | <i>Rhodotorula glutinis</i>                                       | cv. Kalamata table olive fermentation | 0-250 g/L | 3.5          | 12h for 7days | Not mentined | 27.1  | 16.9  | 35.9  | 99.33  | 80.2   | 116.7  | 3 | (Stamato ula Bonatsou et al., 2018) |
|                      |                                                                   |                                       |           | 5            | 12h for 7days | Not mentined | 26.73 | 14.3  | 41.3  | 131.8  | 74.8   | 183.4  | 3 | (Stamato ula Bonatsou et al., 2018) |
|                      |                                                                   |                                       |           | 6.5          | 12h for 7days | Not mentined | 30.7  | 11.7  | 49.9  | 211.47 | 99.6   | 404.2  | 3 | (Stamato ula Bonatsou et al., 2018) |
|                      | <i>Rhodotorula mucilaginosa</i>                                   | cv. Kalamata table olive fermentation | 0-250 g/L | 3.5          | 12h for 7days | Not mentined | 52.4  | 52.4  | 52.4  | 95.6   | 95.6   | 95.6   | 1 | (Stamato ula Bonatsou et al., 2018) |
|                      |                                                                   |                                       |           | 5            | 12h for 7days | Not mentined | 52.2  | 52.2  | 52.2  | 122.6  | 122.6  | 122.6  | 1 | (Stamato ula Bonatsou et al., 2018) |
|                      |                                                                   |                                       |           | 6.5          | 12h for 7days | Not mentined | 62.5  | 62.5  | 62.5  | 119.1  | 119.1  | 119.1  | 1 | (Stamato ula Bonatsou et al., 2018) |
|                      | <i>Saccharomyces boulardii</i><br><i>Saccharomyces cerevisiae</i> | Greek black olives                    | 0-250 g/L | Not mentined | 2h            | Not mentined | 58.26 | 58.26 | 58.26 | 266.02 | 266.02 | 266.02 | 1 | (S Bonatsou et al., 2015)           |
|                      |                                                                   | fermented black olive                 | 0-180 g/L | 4.5          | 7days         | 28           | 24.54 | 24.54 | 24.54 | 86.39  | 86.39  | 86.39  | 1 | (Porru et al., 2018)                |
|                      |                                                                   | cv. Kalamata table olive fermentation | 0-250 g/L | 3.5          | 12h for 7days | Not mentined | 35.5  | 21.8  | 45.9  | 146.73 | 119    | 200    | 6 | (Stamato ula Bonatsou et al., 2018) |
|                      |                                                                   |                                       |           | 5            | 12h for 7days | Not mentined | 60.37 | 41.1  | 85.3  | 174.83 | 139.1  | 195.2  | 6 | (Stamato ula Bonatsou et al., 2018) |
|                      |                                                                   |                                       |           | 6.5          | 12h for 7days | Not mentined | 40.03 | 0     | 67.1  | 143.8  | 0      | 214.9  | 6 | (Stamato ula Bonatsou et al., 2018) |
|                      |                                                                   | fermented black olive                 | 0-180 g/L | 4.5          | 7days         | 28           | 24.82 | 24.82 | 24.82 | 86.29  | 86.29  | 86.29  | 1 | (Porru et al., 2018)                |

|                          |                                 |                                       |           |              |               |              |       |       |       |        |        |        |   |                                     |
|--------------------------|---------------------------------|---------------------------------------|-----------|--------------|---------------|--------------|-------|-------|-------|--------|--------|--------|---|-------------------------------------|
|                          |                                 | Greek black olives                    | 0-250 g/L | Not mentined | 2h            | Not mentined | 86.3  | 86.3  | 86.3  | 274.44 | 274.44 | 274.44 | 1 | (S Bonatsou et al., 2015)           |
| <i>Wickerhamomyces</i>   | <i>Wickerhamomyces anomalus</i> | fermented black olive                 | 0-180 g/L | 4.5          | 7days         | 28           | 114.8 | 114.8 | 114.8 | 171.47 | 171.47 | 171.47 | 1 | (Porru et al., 2018)                |
|                          |                                 | Greek black olives                    | 0-250 g/L | Not mentined | 2h            | Not mentined | 47.27 | 47.27 | 47.27 | 163.18 | 163.18 | 163.18 | 1 | (S Bonatsou et al., 2015)           |
| <i>Zygoascus</i>         | <i>Zygoascus hellenicus</i>     | cv. Kalamata table olive fermentation | 0-250 g/L | 3.5          | 12h for 7days | Not mentined | 76.53 | 37.7  | 96.4  | 125.23 | 115.4  | 143.2  | 3 | (Stamato ula Bonatsou et al., 2018) |
|                          |                                 |                                       |           | 5            | 12h for 7days | Not mentined | 81.23 | 68.8  | 93.7  | 147.13 | 146.6  | 147.9  | 3 | (Stamato ula Bonatsou et al., 2018) |
|                          |                                 |                                       |           | 6.5          | 12h for 7days | Not mentined | 54.43 | 28.3  | 78.3  | 129.63 | 112.9  | 157.9  | 3 | (Stamato ula Bonatsou et al., 2018) |
| <i>Zygosaccharomyces</i> | <i>Zygosaccharomyces mrakii</i> | fermented black olive                 | 0-180 g/L | 4.5          | 7days         | 28           | 40.55 | 40.55 | 40.55 | 96.74  | 96.74  | 96.74  | 1 | (Porru et al., 2018)                |

Media for all: YM broth

**Table S4. The percentage auto-aggregation capacity of the selected yeast strains, incubated at 37C and measured at different time intervals**

| Genus                | Species                        | Source                                       | Time | Media                   | Mean  | Autoag. minimum | Maximum | Count | Reference                          |
|----------------------|--------------------------------|----------------------------------------------|------|-------------------------|-------|-----------------|---------|-------|------------------------------------|
| <i>Aureobasidium</i> | <i>Aureobasidium pullulans</i> | cv. Kalamata table olive fermentation        | 24h  | PBS                     | 91.25 | 84              | 95      | 4     | (Stamatoula Bonatsou et al., 2018) |
|                      |                                |                                              | 2h   | PBS                     | 84.75 | 76              | 94      | 4     | (Stamatoula Bonatsou et al., 2018) |
|                      |                                |                                              | 4h   | PBS                     | 84    | 80              | 88      | 4     | (Stamatoula Bonatsou et al., 2018) |
| <i>Candida</i>       | <i>Candida adriatica</i>       | Olive Oil                                    | 4h   | Sodium Phosphate buffer | 21    | 10              | 32      | 2     | (Zullo & Cifardini, 2019)          |
|                      | <i>Candida boidinii</i>        | cv. Kalamata table olive fermentation        | 24h  | PBS                     | 93.5  | 90              | 96      | 4     | (Stamatoula Bonatsou et al., 2018) |
|                      |                                |                                              | 2h   | PBS                     | 77    | 58              | 90      | 4     | (Stamatoula Bonatsou et al., 2018) |
|                      |                                |                                              | 4h   | PBS                     | 74.25 | 57              | 84      | 4     | (Stamatoula Bonatsou et al., 2018) |
|                      |                                | fermented Portuguese table olives            | 24h  | 0.9%NaCl salin solution | 50.97 | 25.36           | 76.58   | 2     | (Oliveira et al., 2017)            |
|                      |                                |                                              | 2h   | 0.9%NaCl salin solution | 17.48 | 8.96            | 26      | 2     | (Oliveira et al., 2017)            |
|                      |                                |                                              | 4h   | 0.9%NaCl salin solution | 28    | 14              | 42      | 2     | (Oliveira et al., 2017)            |
|                      | <i>Candida Caribbica</i>       | pineapple peel                               | 24h  | PBS                     | 99    | 99              | 99      | 2     | (Amorim et al., 2018)              |
|                      | <i>Candida diddensiae</i>      | cv. Kalamata table olive fermentation        | 24h  | PBS                     | 92    | 92              | 92      | 2     | (Stamatoula Bonatsou et al., 2018) |
|                      |                                |                                              | 2h   | PBS                     | 60    | 60              | 60      | 2     | (Stamatoula Bonatsou et al., 2018) |
|                      |                                |                                              | 4h   | PBS                     | 64    | 64              | 64      | 2     | (Stamatoula Bonatsou et al., 2018) |
|                      |                                | Olive Oil                                    | 4h   | Sodium Phosphate buffer | 35.5  | 23              | 48      | 2     | (Zullo & Cifardini, 2019)          |
|                      |                                |                                              | 24h  | PBS                     | 96    | 96              | 96      | 3     | (Amorim et al., 2018)              |
|                      |                                |                                              | 2h   | PBS                     | 4     | 0               | 7       | 3     | (Amorim, Piccoli, and Duarte 2018) |
|                      | <i>Candida molendinolei</i>    | cv. Kalamata table olive fermentation        | 4h   | PBS                     | 40.67 | 38              | 43      | 3     | (Amorim et al., 2018)              |
|                      |                                |                                              | 24h  | PBS                     | 92.67 | 90              | 96      | 3     | (Stamatoula Bonatsou et al., 2018) |
|                      |                                |                                              | 2h   | PBS                     | 42.33 | 22              | 75      | 3     | (Stamatoula Bonatsou et al., 2018) |
|                      | <i>Candida naeodendra</i>      | cv. Kalamata table olive fermentation        | 4h   | PBS                     | 48.33 | 30              | 78      | 3     | (Stamatoula Bonatsou et al., 2018) |
|                      |                                |                                              | 24h  | PBS                     | 94    | 94              | 94      | 1     | (Stamatoula Bonatsou et al., 2018) |
|                      |                                |                                              | 2h   | PBS                     | 83    | 83              | 83      | 1     | (Stamatoula Bonatsou et al., 2018) |
|                      | <i>Candida norvegica</i>       | fermented Portuguese table olives            | 4h   | PBS                     | 79    | 79              | 79      | 1     | (Stamatoula Bonatsou et al., 2018) |
|                      |                                |                                              | 24h  | 0.9%NaCl salin solution | 83    | 83              | 83      | 1     | (Oliveira et al., 2017)            |
|                      |                                |                                              | 2h   | 0.9%NaCl salin solution | 38.27 | 38.27           | 38.27   | 1     | (Oliveira et al., 2017)            |
|                      | <i>Candida orthopsilosis</i>   | fermented food, cocoa fermentation, and kefi | 4h   | 0.9%NaCl salin solution | 59    | 59              | 59      | 1     | (Oliveira et al., 2017)            |
|                      |                                |                                              | 5h   | PBS                     | 87.5  | 87              | 88      | 2     | (Menezes et al., 2020)             |

|                          |                                     |                                              |       |                         |       |       |       |   |                                           |
|--------------------------|-------------------------------------|----------------------------------------------|-------|-------------------------|-------|-------|-------|---|-------------------------------------------|
|                          | <i>Candida pararugosa</i>           | food origin                                  | 30min | 0.9%NaCl salin solution | 63    | 63    | 63    | 1 | (Fernandez-Pacheco Rodríguez et al., 2018 |
|                          | <i>Candida quercitrusa</i>          | fermented food, cocoa fermentation, and kefi | 5h    | PBS                     | 96    | 96    | 96    | 1 | (Menezes et al., 2020)                    |
|                          | <i>Candida sake</i>                 | food origin                                  | 30min | 0.9%NaCl salin solution | 16    | 16    | 16    | 1 | (Fernandez-Pacheco Rodríguez et al., 2018 |
|                          | <i>Candida tropicalis</i>           | fermented Portuguese table olives            | 24h   | 0.9%NaCl salin solution | 86.16 | 78.37 | 93.94 | 2 | (Oliveira et al., 2017)                   |
|                          |                                     |                                              | 2h    | 0.9%NaCl salin solution | 70.5  | 66    | 75    | 2 | (Oliveira et al., 2017)                   |
|                          |                                     |                                              | 4h    | 0.9%NaCl salin solution | 74.42 | 71.29 | 77.54 | 2 | (Oliveira et al., 2017)                   |
|                          | <i>Candida vini</i>                 | food origin                                  | 30min | 0.9%NaCl salin solution | 42    | 42    | 42    | 1 | (Fernandez-Pacheco Rodríguez et al., 2018 |
| <i>Cystofilobasidium</i> | <i>Cystofilobasidium bisporidii</i> | cv. Kalamata table olive fermentation        | 24h   | PBS                     | 90    | 90    | 90    | 1 | (Stamatoula Bonatsou et al., 2018)        |
|                          |                                     |                                              | 2h    | PBS                     | 37    | 37    | 37    | 1 | (Stamatoula Bonatsou et al., 2018)        |
|                          |                                     |                                              | 4h    | PBS                     | 36    | 36    | 36    | 1 | (Stamatoula Bonatsou et al., 2018)        |
| <i>Debaryomyce</i>       | <i>Debaryomyces hansenii</i>        | fermented Portuguese table olives            | 24h   | 0.9%NaCl salin solution | 34.37 | 34.37 | 34.37 | 1 | (Oliveira et al., 2017)                   |
|                          |                                     |                                              | 2h    | 0.9%NaCl salin solution | 31    | 31    | 31    | 1 | (Oliveira et al., 2017)                   |
|                          |                                     |                                              | 4h    | 0.9%NaCl salin solution | 30.83 | 30.83 | 30.83 | 1 | (Oliveira et al., 2017)                   |
| <i>Galactomyces</i>      | <i>Galactomyces reessii</i>         | fermented Portuguese table olives            | 24h   | 0.9%NaCl salin solution | 45.33 | 31    | 70.5  | 3 | (Oliveira et al., 2017)                   |
|                          |                                     |                                              | 2h    | 0.9%NaCl salin solution | 28.44 | 22.01 | 34.86 | 2 | (Oliveira et al., 2017)                   |
|                          |                                     |                                              | 4h    | 0.9%NaCl salin solution | 29.21 | 29.21 | 29.21 | 1 | (Oliveira et al., 2017)                   |
| <i>Hanseniaspora</i>     | <i>Hanseniaspora opuntiae</i>       | fermented food, cocoa fermentation, and kefi | 5h    | PBS                     | 66    | 66    | 66    | 1 | (Menezes et al., 2020)                    |
|                          | <i>Hanseniaspora osmophila</i>      | food origin                                  | 30min | 0.9%NaCl salin solution | 48    | 32    | 64    | 2 | (Fernandez-Pacheco Rodríguez et al., 2018 |
|                          | <i>Hanseniaspora uvarum</i>         | fermented food, cocoa fermentation, and kefi | 5h    | PBS                     | 85    | 84    | 86    | 2 | (Menezes et al., 2020)                    |
| <i>Kluyveromyces</i>     | <i>Kluyveromyces lactis</i>         | traditional kefir grains                     | 2h    | PBS                     | 35    | 35    | 35    | 1 | (Gut et al., 2019)                        |
|                          | <i>Kluyveromyces marxianus</i>      | fermented food, cocoa fermentation, and kefi | 5h    | PBS                     | 83    | 76    | 90    | 2 | (Menezes et al., 2020)                    |
|                          | <i>Kluyveromyces thermotolerans</i> | food origin                                  | 30min | 0.9%NaCl salin solution | 28.5  | 14    | 43    | 2 | (Fernandez-Pacheco Rodríguez et al., 2018 |
| <i>Metschnikowia</i>     | <i>Metschnikowia pulcherrima</i>    | cv. Kalamata table olive fermentation        | 24h   | PBS                     | 90    | 85    | 94    | 3 | (Stamatoula Bonatsou et al., 2018)        |
|                          |                                     |                                              | 2h    | PBS                     | 62.33 | 28    | 80    | 3 | (Stamatoula Bonatsou et al., 2018)        |
|                          |                                     |                                              | 4h    | PBS                     | 66    | 31    | 84    | 3 | (Stamatoula Bonatsou et al., 2018)        |
|                          |                                     | food origin                                  | 30min | 0.9%NaCl salin solution | 13    | 13    | 13    | 1 | (Fernandez-Pacheco Rodríguez et al., 2018 |
| <i>Meyerozyma</i>        | <i>Meyerozyma Caribbica</i>         | pineapple peel                               | 2h    | PBS                     | 14.5  | 14    | 15    | 2 | (Amorim et al., 2018)                     |
|                          |                                     |                                              | 4h    | PBS                     | 40.5  | 36    | 45    | 2 | (Amorim et al., 2018)                     |
| <i>Nakazawaea</i>        | <i>Nakazawaea molendini-olei</i>    | Olive Oil                                    | 4h    | Sodium Phosphate buffer | 18    | 8     | 28    | 2 | (Zullo & Ciafardini, 2019)                |
|                          | <i>Nakazawaea wickerhamii</i>       | Olive Oil                                    | 4h    | Sodium Phosphate buffer | 18    | 18    | 18    | 1 | (Zullo & Ciafardini, 2019)                |
| <i>Ogataea</i>           | <i>Ogataea polymorpha</i>           | food origin                                  | 30min | 0.9%NaCl salin solution | 4     | 4     | 4     | 1 | (Fernandez-Pacheco Rodríguez et al., 2018 |

|                    |                               |                                              |                                              |                         |                         |       |       |    |                                            |                                            |
|--------------------|-------------------------------|----------------------------------------------|----------------------------------------------|-------------------------|-------------------------|-------|-------|----|--------------------------------------------|--------------------------------------------|
| <i>Pichia</i>      | <i>Pichia membranifaciens</i> | fermented Portuguese table olives            | 24h                                          | 0.9%NaCl salin solution | 76.6                    | 76.13 | 77.08 | 2  | (Oliveira et al., 2017)                    |                                            |
|                    | <i>Pichia anomala</i>         | food origin                                  | 30min                                        | 0.9%NaCl salin solution | 19.5                    | 11    | 28    | 2  | (Fernandez-Pacheco Rodríguez et al., 2018) |                                            |
|                    | <i>Pichia caribbica</i>       | food origin                                  | 30min                                        | 0.9%NaCl salin solution | 7                       | 7     | 7     | 1  | (Fernandez-Pacheco Rodríguez et al., 2018) |                                            |
|                    | <i>Pichia galeiformis</i>     | food origin                                  | 30min                                        | 0.9%NaCl salin solution | 12                      | 12    | 12    | 1  | (Fernandez-Pacheco Rodríguez et al., 2018) |                                            |
|                    | <i>Pichia guilliermondii</i>  | fermented food, cocoa fermentation, and kefi | 5h                                           | PBS                     | 83                      | 83    | 83    | 1  | (Menezes et al., 2020)                     |                                            |
|                    |                               | fermented Portuguese table olives            | 24h                                          | 0.9%NaCl salin solution | 73.66                   | 73.66 | 73.66 | 1  | (Oliveira et al., 2017)                    |                                            |
|                    |                               |                                              | 2h                                           | 0.9%NaCl salin solution | 25                      | 25    | 25    | 1  | (Oliveira et al., 2017)                    |                                            |
|                    |                               |                                              | 4h                                           | 0.9%NaCl salin solution | 30.66                   | 30.66 | 30.66 | 1  | (Oliveira et al., 2017)                    |                                            |
|                    | <i>Pichia kluyveri</i>        | cv. Kalamata table olive fermentation        | 24h                                          | PBS                     | 90                      | 88    | 92    | 2  | (Stamatoula Bonatsou et al., 2018)         |                                            |
|                    |                               |                                              | 2h                                           | PBS                     | 45                      | 41    | 49    | 2  | (Stamatoula Bonatsou et al., 2018)         |                                            |
|                    |                               |                                              | 4h                                           | PBS                     | 53                      | 48    | 58    | 2  | (Stamatoula Bonatsou et al., 2018)         |                                            |
|                    |                               | fermented food, cocoa fermentation, and kefi | 5h                                           | PBS                     | 92                      | 92    | 92    | 1  | (Menezes et al., 2020)                     |                                            |
|                    |                               | food origin                                  | 30min                                        | 0.9%NaCl salin solution | 30                      | 30    | 30    | 1  | (Fernandez-Pacheco Rodríguez et al., 2018) |                                            |
|                    | <i>Pichia kudriavzevii</i>    | food origin                                  | 30min                                        | 0.9%NaCl salin solution | 16.5                    | 5     | 28    | 2  | (Fernandez-Pacheco Rodríguez et al., 2018) |                                            |
|                    | <i>Pichia manshurica</i>      | cv. Kalamata table olive fermentation        | 24h                                          | PBS                     | 91                      | 89    | 92    | 3  | (Stamatoula Bonatsou et al., 2018)         |                                            |
|                    |                               |                                              | 2h                                           | PBS                     | 77                      | 61    | 88    | 3  | (Stamatoula Bonatsou et al., 2018)         |                                            |
|                    |                               |                                              | 4h                                           | PBS                     | 75                      | 55    | 89    | 3  | (Stamatoula Bonatsou et al., 2018)         |                                            |
|                    |                               | fermented Portuguese table olives            | 24h                                          | 0.9%NaCl salin solution | 76.86                   | 76.86 | 76.86 | 1  | (Oliveira et al., 2017)                    |                                            |
|                    |                               |                                              | 2h                                           | 0.9%NaCl salin solution | 13                      | 13    | 13    | 1  | (Oliveira et al., 2017)                    |                                            |
|                    |                               |                                              | 4h                                           | 0.9%NaCl salin solution | 24.75                   | 24.75 | 24.75 | 1  | (Oliveira et al., 2017)                    |                                            |
|                    |                               | <i>Pichia membranifaciens</i>                | fermented food, cocoa fermentation, and kefi | 5h                      | PBS                     | 93    | 93    | 93 | 1                                          | (Menezes et al., 2020)                     |
|                    |                               |                                              | fermented Portuguese table olives            | 2h                      | 0.9%NaCl salin solution | 51.58 | 48.16 | 55 | 2                                          | (Oliveira et al., 2017)                    |
|                    |                               |                                              |                                              | 4h                      | 0.9%NaCl salin solution | 56.5  | 47    | 66 | 2                                          | (Oliveira et al., 2017)                    |
|                    |                               |                                              | food origin                                  | 30min                   | 0.9%NaCl salin solution | 41    | 41    | 41 | 1                                          | (Fernandez-Pacheco Rodríguez et al., 2018) |
| <i>Rhodotorula</i> | <i>Rhodotorula glutinis</i>   | cv. Kalamata table olive fermentation        | 24h                                          | PBS                     | 91.67                   | 87    | 96    | 3  | (Stamatoula Bonatsou et al., 2018)         |                                            |
|                    |                               |                                              | 2h                                           | PBS                     | 50                      | 38    | 62    | 3  | (Stamatoula Bonatsou et al., 2018)         |                                            |
|                    |                               |                                              | 4h                                           | PBS                     | 66                      | 46    | 80    | 3  | (Stamatoula Bonatsou et al., 2018)         |                                            |
|                    |                               | fermented Portuguese table olives            | 24h                                          | 0.9%NaCl salin solution | 23.67                   | 23.67 | 23.67 | 1  | (Oliveira et al., 2017)                    |                                            |
|                    |                               |                                              | 2h                                           | 0.9%NaCl salin solution | 2.86                    | 2.86  | 2.86  | 1  | (Oliveira et al., 2017)                    |                                            |
|                    |                               |                                              | 4h                                           | 0.9%NaCl salin solution | 5.12                    | 5.12  | 5.12  | 1  | (Oliveira et al., 2017)                    |                                            |
|                    |                               |                                              |                                              |                         |                         |       |       |    |                                            |                                            |

|                        |                                                       |                                              |       |                         |       |       |       |    |                                            |
|------------------------|-------------------------------------------------------|----------------------------------------------|-------|-------------------------|-------|-------|-------|----|--------------------------------------------|
| <i>Saccharomyces</i>   | <i>Rhodotorula graminis</i>                           | fermented Portuguese table olives            | 24h   | 0.9%NaCl salin solution | 20.11 | 20.11 | 20.11 | 1  | (Oliveira et al., 2017)                    |
|                        |                                                       |                                              | 2h    | 0.9%NaCl salin solution | 3.35  | 3.35  | 3.35  | 1  | (Oliveira et al., 2017)                    |
|                        |                                                       |                                              | 4h    | 0.9%NaCl salin solution | 4     | 4     | 4     | 1  | (Oliveira et al., 2017)                    |
|                        | <i>Rhodotorula mucilaginosa</i>                       | cv. Kalamata table olive fermentation        | 24h   | PBS                     | 90    | 90    | 90    | 1  | (Stamatoula Bonatsou et al., 2018)         |
|                        |                                                       |                                              | 2h    | PBS                     | 74    | 74    | 74    | 1  | (Stamatoula Bonatsou et al., 2018)         |
|                        |                                                       |                                              | 4h    | PBS                     | 74    | 74    | 74    | 1  | (Stamatoula Bonatsou et al., 2018)         |
|                        | <i>Saccharomyces boulardii</i>                        | fermented food, cocoa fermentation, and kefi | 5h    | PBS                     | 96    | 96    | 96    | 1  | (Menezes et al., 2020)                     |
|                        |                                                       |                                              | 24h   | 0.9%NaCl salin solution | 55.9  | 34.75 | 77.05 | 2  | (Oliveira et al., 2017)                    |
|                        |                                                       |                                              | 2h    | 0.9%NaCl salin solution | 25.5  | 25.5  | 25.5  | 1  | (Oliveira et al., 2017)                    |
|                        |                                                       | Olive Oil                                    | 4h    | Sodium Phosphate buffer | 43    | 43    | 43    | 1  | (Zullo & Ciafardini, 2019)                 |
|                        |                                                       |                                              | 2h    | PBS                     | 37    | 31    | 43    | 2  | (Gut et al., 2019)                         |
|                        |                                                       |                                              | 2h    | PBS                     | 95.25 | 94    | 96    | 4  | (Stamatoula Bonatsou et al., 2018)         |
|                        | <i>Saccharomyces cerevisiae</i>                       | cv. Kalamata table olive fermentation        | 2h    | PBS                     | 84.75 | 72    | 90    | 4  | (Stamatoula Bonatsou et al., 2018)         |
|                        |                                                       |                                              | 4h    | PBS                     | 82.5  | 67    | 91    | 4  | (Stamatoula Bonatsou et al., 2018)         |
|                        |                                                       |                                              | 5h    | PBS                     | 94.07 | 68    | 99    | 14 | (Menezes et al., 2020)                     |
|                        |                                                       | fermented food, cocoa fermentation, and kefi | 24h   | 0.9%NaCl salin solution | 83.02 | 74.33 | 91.71 | 2  | (Oliveira et al., 2017)                    |
|                        |                                                       |                                              | 2h    | 0.9%NaCl salin solution | 56.99 | 54    | 59.97 | 2  | (Oliveira et al., 2017)                    |
|                        |                                                       |                                              | 4h    | 0.9%NaCl salin solution | 71.62 | 71.23 | 72    | 2  | (Oliveira et al., 2017)                    |
|                        | <i>Saccharomyces cerevisiae</i> var. <i>boulardii</i> | food origin                                  | 30min | 0.9%NaCl salin solution | 20    | 20    | 20    | 1  | (Fernandez-Pacheco Rodríguez et al., 2018) |
|                        |                                                       |                                              | 30min | 0.9%NaCl salin solution | 19    | 19    | 19    | 1  | (Fernandez-Pacheco Rodríguez et al., 2018) |
|                        |                                                       |                                              | 24h   | PBS                     | 96    | 96    | 96    | 1  | (Amorim et al., 2018)                      |
|                        |                                                       | pineapple peel                               | 2h    | PBS                     | 3     | 3     | 3     | 1  | (Amorim et al., 2018)                      |
|                        |                                                       |                                              | 4h    | PBS                     | 44    | 44    | 44    | 1  | (Amorim et al., 2018)                      |
|                        |                                                       |                                              | 2h    | PBS                     | 43    | 43    | 43    | 1  | (Gut et al., 2019)                         |
|                        | <i>Saccharomyces unisporus</i>                        | traditional kefir grains                     | 5h    | PBS                     | 96    | 96    | 96    | 1  | (Menezes et al., 2020)                     |
|                        | <i>Saccharomyces cerevisiae</i>                       | fermented food, cocoa fermentation, and kefi | 30min | 0.9%NaCl salin solution | 19    | 19    | 19    | 1  | (Fernandez-Pacheco Rodríguez et al., 2018) |
| <i>Torulaspora</i>     | <i>Torulaspora delbrueckii</i>                        | food origin                                  | 4h    | Sodium Phosphate buffer | 30    | 28    | 32    | 2  | (Zullo & Ciafardini, 2019)                 |
| <i>Wickerhamomyces</i> | <i>Wickerhamomyces anomalus</i>                       | Olive Oil                                    | 4h    | Sodium Phosphate buffer | 31.5  | 30    | 33    | 2  | (Zullo & Ciafardini, 2019)                 |
| <i>Yamadazyma</i>      | <i>Yamadazyma terventina</i>                          | Olive Oil                                    | 24h   | PBS                     | 90.67 | 88    | 92    | 3  | (Stamatoula Bonatsou et al., 2018)         |
| <i>Zygoascus</i>       | <i>Zygoascus hellenicus</i>                           | cv. Kalamata table olive fermentation        | 2h    | PBS                     | 43    | 25    | 65    | 3  | (Stamatoula Bonatsou et al., 2018)         |
|                        |                                                       |                                              | 4h    | PBS                     | 51    | 36    | 70    | 3  | (Stamatoula Bonatsou et al., 2018)         |

|                          |                                     |             |       |                         |    |    |    |   |                                           |
|--------------------------|-------------------------------------|-------------|-------|-------------------------|----|----|----|---|-------------------------------------------|
| <i>Zygosaccharomyces</i> | <i>Zygosaccharomyces bailii</i>     | food origin | 30min | 0.9%NaCl salin solution | 35 | 35 | 35 | 1 | (Fernandez-Pacheco Rodríguez et al., 2018 |
|                          | <i>Zygosaccharomyces fermentati</i> | food origin | 30min | 0.9%NaCl salin solution | 13 | 4  | 26 | 3 | (Fernandez-Pacheco Rodríguez et al., 2018 |

---

**Table S5. The percentage of hydrophobicity capacity of the selected yeast strains, incubated at 37C and measured at different time intervals.**

| Genus         | Species                      | Source                                                             | Time   | Temp          | Media            | Reference                                  | Hexadecane |          |          |        | Xylene |          |          |        | Tolene |          |          |        |
|---------------|------------------------------|--------------------------------------------------------------------|--------|---------------|------------------|--------------------------------------------|------------|----------|----------|--------|--------|----------|----------|--------|--------|----------|----------|--------|
|               |                              |                                                                    |        |               |                  |                                            | Me an      | Mini mum | Maxi mum | Co unt | Me an  | Mini mum | Maxi mum | Co unt | Me an  | Mini mum | Maxi mum | Co unt |
| Candida       | Candida adriatica            | Olive Oil                                                          | 1h     | not mentioned | PBS              | (Zullo & Ciafardini, 2019)                 | 37.5       | 19.5     | 55.5     | 2      | .      | .        | .        | 2      | .      | .        | .        | 2      |
|               | Candida diddensiae           | Olive Oil                                                          | 1h     | not mentioned | PBS              | (Zullo & Ciafardini, 2019)                 | 29         | 16.5     | 41.5     | 2      | .      | .        | .        | 2      | .      | .        | .        | 2      |
|               | Candida Lusitaniae           | pineapple peel                                                     | 30 min | 37            | PBS              | (Amorim et al., 2018)                      | 91.9       | 91.9     | 91.9     | 1      | 99.66  | 99.66    | 99.66    | 1      | .      | .        | .        | 1      |
|               | Candida orthopsilosis        | Brazilian indigenous fermented food, cocoa fermentation, and kefir | 1h     | 37            | Phosphate Buffer | (Menezes et al., 2020)                     | 98.9       | 97.8     | 100      | 2      | .      | .        | .        | 2      | .      | .        | .        | 2      |
|               | Candida pararugosa           | food origin                                                        | 1h     | 37            | KNO3 solution    | (Fernandez-Pacheco Rodríguez et al., 2018) | 51.09      | 51.09    | 51.09    | 1      | .      | .        | .        | 1      | 25.87  | 25.87    | 25.87    | 1      |
|               | Candida quercitrusa          | Brazilian indigenous fermented food, cocoa fermentation, and kefir | 1h     | 37            | Phosphate Buffer | (Menezes et al., 2020)                     | 98.9       | 98.9     | 98.9     | 1      | .      | .        | .        | 1      | .      | .        | .        | 1      |
|               | Candida sake                 | food origin                                                        | 1h     | 37            | KNO3 solution    | (Fernandez-Pacheco Rodríguez et al., 2018) | 6.64       | 6.64     | 6.64     | 1      | .      | .        | .        | 1      | 13.35  | 13.35    | 13.35    | 1      |
| Hanseniaspora | Candida vini                 | food origin                                                        | 1h     | 37            | KNO3 solution    | (Fernandez-Pacheco Rodríguez et al., 2018) | 30.81      | 30.81    | 30.81    | 1      | .      | .        | .        | 1      | 33.09  | 33.09    | 33.09    | 1      |
|               | Hanseniaspora opuntiae       | Brazilian indigenous fermented food, cocoa fermentation, and kefir | 1h     | 37            | Phosphate Buffer | (Menezes et al., 2020)                     | 98.7       | 98.7     | 98.7     | 1      | .      | .        | .        | 1      | .      | .        | .        | 1      |
|               | Hanseniaspora osmophila      | food origin                                                        | 1h     | 37            | KNO3 solution    | (Fernandez-Pacheco Rodríguez et al., 2018) | 32.02      | 31.51    | 32.52    | 2      | .      | .        | .        | 2      | 30.22  | 27.64    | 32.8     | 2      |
| Kluyveromyces | Hanseniaspora uvarum         | Brazilian indigenous fermented food, cocoa fermentation, and kefir | 1h     | 37            | Phosphate Buffer | (Menezes et al., 2020)                     | 98         | 97.5     | 98.5     | 2      | .      | .        | .        | 2      | .      | .        | .        | 2      |
|               | Kluyveromyces lactis         | traditional kefir grains                                           | 1h     | 37            | PBS              | (Gut et al., 2019)                         | 88.75      | 88.75    | 88.75    | 1      | .      | .        | .        | 1      | .      | .        | .        | 1      |
|               | Kluyveromyces marxianus      | Brazilian indigenous fermented food, cocoa fermentation, and kefir | 1h     | 37            | Phosphate Buffer | (Menezes et al., 2020)                     | 99.45      | 98.9     | 100      | 2      | .      | .        | .        | 2      | .      | .        | .        | 2      |
| Metschnikowia | Kluyveromyces thermotolerans | food origin                                                        | 1h     | 37            | KNO3 solution    | (Fernandez-Pacheco Rodríguez et al., 2018) | 20.77      | 10.41    | 31.12    | 2      | .      | .        | .        | 2      | 14.46  | 3.67     | 25.25    | 2      |
|               | Metschnikowia pulcherrima    | food origin                                                        | 1h     | 37            | KNO3 solution    | (Fernandez-Pacheco Rodríguez et al., 2018) | 15.22      | 15.22    | 15.22    | 1      | .      | .        | .        | 1      | 15.05  | 15.05    | 15.05    | 1      |
|               | Meyerozyma Caribbica         | pineapple peel                                                     | 30 min | 37            | PBS              | (Amorim et al., 2018)                      | 68.2       | 46.3     | 90.1     | 2      | 64.13  | 28.7     | 99.55    | 2      | .      | .        | .        | 2      |
| Nakazawaea    | Nakazawaea molendini-olei    | Olive Oil                                                          | 1h     | not mentioned | PBS              | (Zullo & Ciafardini, 2019)                 | 0          | 0        | 0        | 2      | .      | .        | .        | 2      | .      | .        | .        | 2      |
|               | Nakazawaea wickerhamii       | Olive Oil                                                          | 1h     | not mentioned | PBS              | (Zullo & Ciafardini, 2019)                 | 0          | 0        | 0        | 1      | .      | .        | .        | 1      | .      | .        | .        | 1      |
| Ogataea       | Ogataea polymorpha           | food origin                                                        | 1h     | 37            | KNO3 solution    | (Fernandez-Pacheco Rodríguez et al., 2018) | 10.55      | 10.55    | 10.55    | 1      | .      | .        | .        | 1      | 5.44   | 5.44     | 5.44     | 1      |
| Pichia        | Pichia anomala               | food origin                                                        | 1h     | 37            | KNO3 solution    | (Fernandez-Pacheco Rodríguez et al., 2018) | 27.16      | 23.84    | 30.47    | 2      | .      | .        | .        | 2      | 31.71  | 31.45    | 31.97    | 2      |
|               | Pichia caribbica             | food origin                                                        | 1h     | 37            | KNO3 solution    | (Fernandez-Pacheco Rodríguez et al., 2018) | 3.16       | 3.16     | 3.16     | 1      | .      | .        | .        | 1      | 10.76  | 10.76    | 10.76    | 1      |

|                     |                                                       |                                                                    |    |               |                  |                                            |       |       |       |    |   |   |   |    |       |       |       |    |
|---------------------|-------------------------------------------------------|--------------------------------------------------------------------|----|---------------|------------------|--------------------------------------------|-------|-------|-------|----|---|---|---|----|-------|-------|-------|----|
|                     | <i>Pichia galeiformis</i>                             | food origin                                                        | 1h | 37            | KNO3 solution    | (Fernandez-Pacheco Rodríguez et al., 2018) | 21.49 | 21.49 | 21.49 | 1  | . | . | . | 1  | 29.6  | 29.6  | 29.6  | 1  |
|                     | <i>Pichia guilliermondii</i>                          | Brazilian indigenous fermented food, cocoa fermentation, and kefir | 1h | 37            | Phosphate Buffer | (Menezes et al., 2020)                     | 94.9  | 94.9  | 94.9  | 1  | . | . | . | 1  | .     | .     | .     | 1  |
|                     | <i>Pichia kluyveri</i>                                | Brazilian indigenous fermented food, cocoa fermentation, and kefir | 1h | 37            | Phosphate Buffer | (Menezes et al., 2020)                     | 99.3  | 99.3  | 99.3  | 1  | . | . | . | 1  | .     | .     | .     | 1  |
|                     |                                                       | food origin                                                        | 1h | 37            | KNO3 solution    | (Fernandez-Pacheco Rodríguez et al., 2018) | 37.9  | 37.9  | 37.9  | 1  | . | . | . | 1  | 10.55 | 10.55 | 10.55 | 1  |
|                     | <i>Pichia kudriavzevii</i>                            | food origin                                                        | 1h | 37            | KNO3 solution    | (Fernandez-Pacheco Rodríguez et al., 2018) | 27.54 | 22.09 | 32.99 | 2  | . | . | . | 2  | 11.13 | 11.03 | 11.22 | 2  |
|                     | <i>Pichia membranifaciens</i>                         | Brazilian indigenous fermented food, cocoa fermentation, and kefir | 1h | 37            | Phosphate Buffer | (Menezes et al., 2020)                     | 99.7  | 99.7  | 99.7  | 1  | . | . | . | 1  | .     | .     | .     | 1  |
|                     |                                                       | food origin                                                        | 1h | 37            | KNO3 solution    | (Fernandez-Pacheco Rodríguez et al., 2018) | 33.04 | 33.04 | 33.04 | 1  | . | . | . | 1  | 15.66 | 15.66 | 15.66 | 1  |
| Saccharomycetes     | <i>Saccharomyces boulardii</i>                        | Brazilian indigenous fermented food, cocoa fermentation, and kefir | 1h | 37            | Phosphate Buffer | (Menezes et al., 2020)                     | 99.4  | 99.4  | 99.4  | 1  | . | . | . | 1  | .     | .     | .     | 1  |
|                     |                                                       | Olive Oil                                                          | 1h | not mentioned | PBS              | (Zullo & Ciafardini, 2019)                 | 26    | 26    | 26    | 1  | . | . | . | 1  | .     | .     | .     | 1  |
|                     |                                                       | traditional kefir grains                                           | 1h | 37            | PBS              | (Gut et al., 2019)                         | 18.38 | 15.58 | 21.18 | 2  | . | . | . | 2  | .     | .     | .     | 2  |
|                     | <i>Saccharomyces cerevisiae</i>                       | Brazilian indigenous fermented food, cocoa fermentation, and kefir | 1h | 37            | Phosphate Buffer | (Menezes et al., 2020)                     | 99.52 | 96.5  | 100   | 15 | . | . | . | 15 | .     | .     | .     | 15 |
|                     |                                                       | food origin                                                        | 1h | 37            | KNO3 solution    | (Fernandez-Pacheco Rodríguez et al., 2018) | 38.74 | 38.74 | 38.74 | 1  | . | . | . | 1  | 26.68 | 26.68 | 26.68 | 1  |
|                     | <i>Saccharomyces cerevisiae</i> var. <i>boulardii</i> | food origin                                                        | 1h | 37            | KNO3 solution    | (Fernandez-Pacheco Rodríguez et al., 2018) | 37.15 | 37.15 | 37.15 | 1  | . | . | . | 1  | 32.41 | 32.41 | 32.41 | 1  |
|                     | <i>Saccharomyces unisporus</i>                        | traditional kefir grains                                           | 1h | 37            | PBS              | (Gut et al., 2019)                         | 30    | 30    | 30    | 1  | . | . | . | 1  | .     | .     | .     | 1  |
|                     | <i>Torulaspora delbrueckii</i>                        | food origin                                                        | 1h | 37            | KNO3 solution    | (Fernandez-Pacheco Rodríguez et al., 2018) | 37.41 | 37.41 | 37.41 | 1  | . | . | . | 1  | 19.34 | 19.34 | 19.34 | 1  |
|                     | <i>Wickerhamomyces anomalus</i>                       | Olive Oil                                                          | 1h | not mentioned | PBS              | (Zullo & Ciafardini, 2019)                 | 22.25 | 20.5  | 24    | 2  | . | . | . | 2  | .     | .     | .     | 2  |
|                     | <i>Yamadazyma</i>                                     | Olive Oil                                                          | 1h | not mentioned | PBS              | (Zullo & Ciafardini, 2019)                 | 41.5  | 37.5  | 45.5  | 2  | . | . | . | 2  | .     | .     | .     | 2  |
| Zygosaccharomycetes | <i>Zygosaccharomyces bailii</i>                       | food origin                                                        | 1h | 37            | KNO3 solution    | (Fernandez-Pacheco Rodríguez et al., 2018) | 54.16 | 54.16 | 54.16 | 1  | . | . | . | 1  | 35.11 | 35.11 | 35.11 | 1  |
|                     | <i>Zygosaccharomyces fermentati</i>                   | food origin                                                        | 1h | 37            | KNO3 solution    | (Fernandez-Pacheco Rodríguez et al., 2018) | 9.5   | 8.18  | 10.33 | 3  | . | . | . | 3  | 6.4   | 3.12  | 8.28  | 3  |
